# Supplementary material for: Nitrogen-doped BiOBr nanosheets with preferentially exposed (102) facets enhanced visible-light photoreactivity
Source: Royal Society of Chemistry journal article supplement (doi:10.1039/d2nj04676h), 2022-12-22
Supplement: d2nj04676h1.pdf [file d2nj04676h1.pdf]

## Supporting Information

### **Nitrogen-doped BiOBr nanosheets with preferentially exposed (102) facets enhanced visible-light photoreactivity**

Guangbi Li,<sup>\*a,b</sup> Jie Yang,<sup>b</sup> Xinhui Yang,<sup>c</sup> Mila Liu,<sup>b</sup> Bingyan Liu,<sup>d</sup> Zhuolan Li,<sup>e</sup> Kexin Bao,<sup>e</sup> Yurong Wang,<sup>e</sup> Zhiwei Wang,<sup>e</sup> Huan Zhou<sup>a</sup>

<sup>a</sup> College of Chemical Engineering & Materials Science, Tianjin University of Science & Technology, Tianjin 300457, P. R. China

<sup>b</sup> Key Laboratory of Marine Resource Chemistry & Food Technology, Ministry of Education, College of Marine and Environmental Sciences, Tianjin University of Science & Technology, Tianjin 300457, P. R. China

<sup>c</sup> State Key Laboratory of Chemical Engineering, School of Chemical Engineering & Technology, Tianjin University, Tianjin 300072, P. R. China

<sup>d</sup> Tianjin Tiandi Chuangzhi Technology Development Co., Ltd., Tianjin 300392, P. R. China

<sup>e</sup> State Key Laboratory of Food Nutrition and Safety, College of Food Science & Engineering, Tianjin University of Science & Technology, Tianjin 300457, P. R. China

\*Corresponding Author:

Dr. Guangbi Li

School of Chemical Engineering and Materials Science

Tianjin University of Science and Technology, Tianjin 300457, P. R. China

Tel: +86-22-60600823

E-mail: gbli@tust.edu.cn

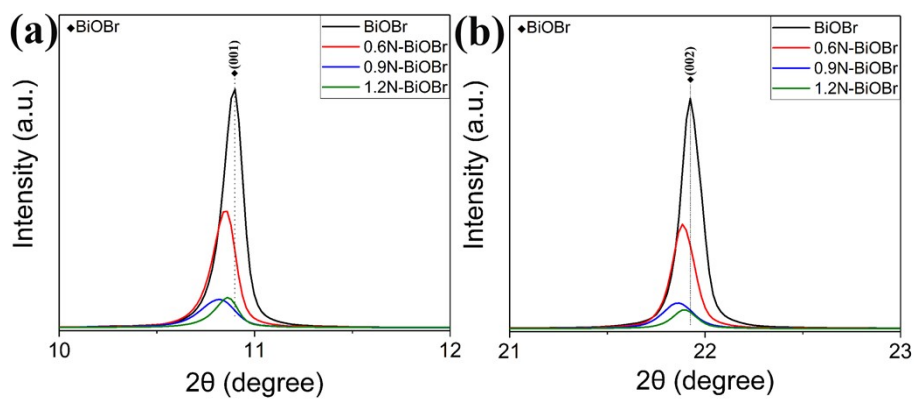

**Fig. S1** XRD amplified patterns of pure BiOBr and  $x$ N-BiOBr.

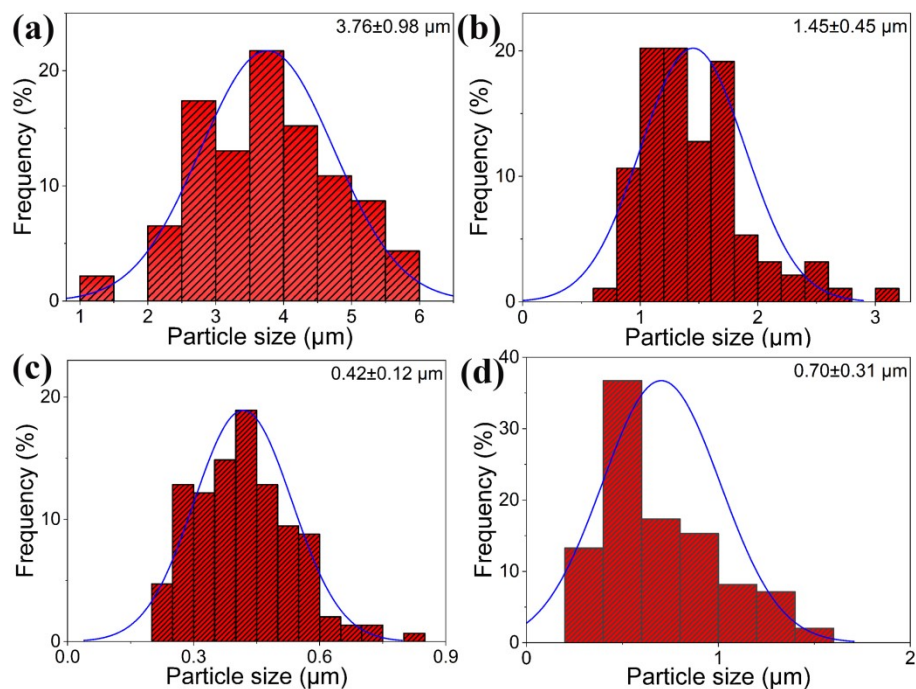

**Fig. S2** The particle size distributions of (a) BiOBr, (b) 0.6N-BiOBr, (c) 0.9N-BiOBr and (d)

1.2N-BiOBr.

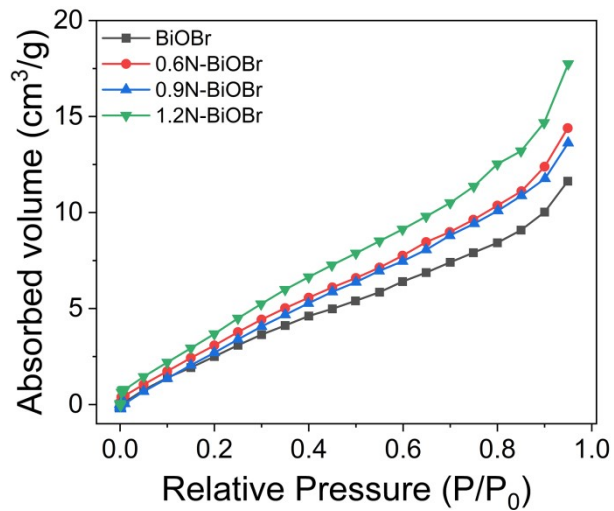

Fig. S3  $N_2$  adsorption isotherms of pure BiOBr and  $xN$ -BiOBr.

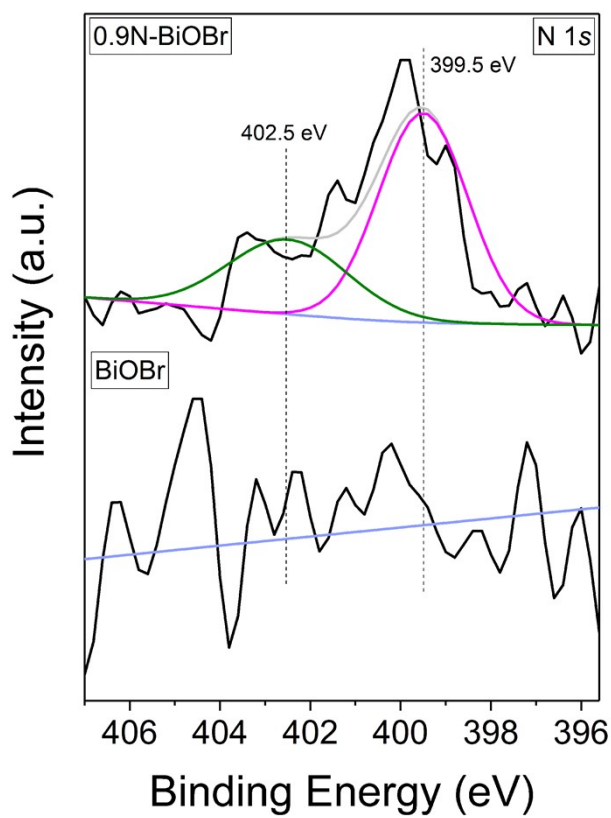

Fig. S4 Typical high-resolution XPS spectra of N 1s of pure BiOBr and 0.9N-BiOBr.

We selected a typical 0.6N-BiOBr as a model photocatalyst based on the results of the previous study, and conducted experiments on the effect of pH on the photocatalytic performance of the samples under visible-light irradiation for 10 min in solutions with different pH values. The pH value of the original reaction solution was 6.9 after adding the 0.6N-BiOBr, and the pH of the reaction solution was adjusted to 9.3 by ammonia water, and to 2.1 and 4.0 by 0.05 mol L<sup>-1</sup> dilute hydrochloric acid.

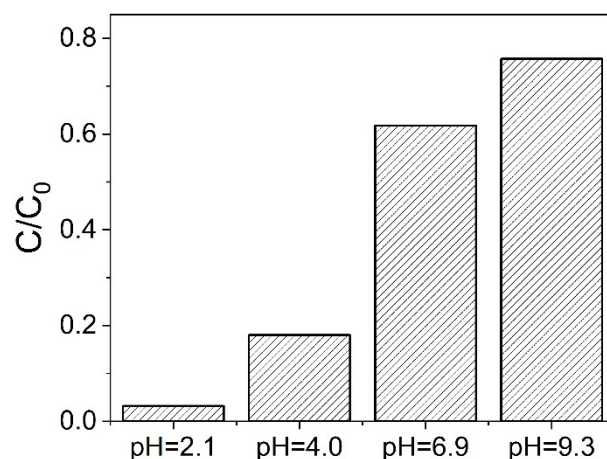

**Fig. S5** Photodegradation performance of a typical 0.6N-BiOBr sample after visible-light irradiation for 10 min at various pH values. (Reaction conditions: RhB 10 mg L<sup>-1</sup>; photocatalyst: 0.1 g L<sup>-1</sup>)

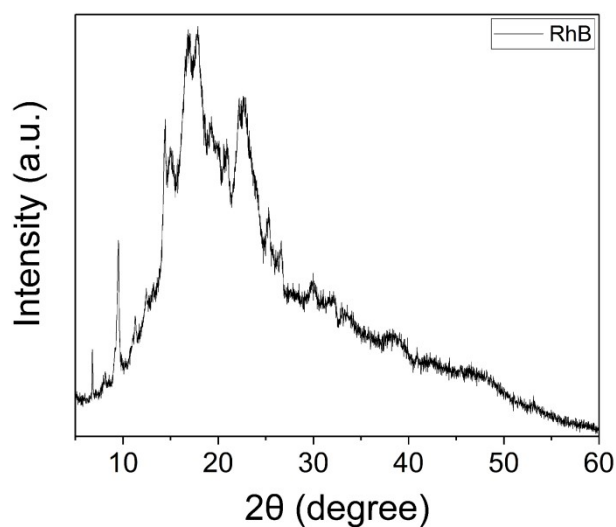

**Fig. S6** XRD pattern of RhB.

**Table S1** Comparison of photodegradation of RhB via use of different photocatalysts under visible-light irradiation.

| Entry | Catalysts                                                      | Reaction conditions |                                       |                     | Degradation performance | References |
|-------|----------------------------------------------------------------|---------------------|---------------------------------------|---------------------|-------------------------|------------|
|       |                                                                | Temperature (°C)    | Load of catalyst (g L <sup>-1</sup> ) | Reaction time (min) |                         |            |
| 1     | SiO <sub>2</sub> -Au GSH-BPEI                                  | 25                  | 0.25                                  | 600                 | 38%                     | 1          |
| 2     | F-Bi <sub>2</sub> WO <sub>6</sub> ( <i>R<sub>F</sub></i> =0.6) | 25                  | 1.0                                   | 180                 | 85%                     | 2          |
| 3     | ZnO-10%RGO                                                     | 25                  | 0.25                                  | 120                 | 98%                     | 3          |
| 4     | BPZ-4                                                          | 25                  | 0.5                                   | 30                  | 99%                     | 4          |
| 5     | S3-BiOBr                                                       | 25                  | 0.33                                  | 20                  | 99%                     | 5          |
| 6     | BOB-CNC-10%350-2h                                              | 25                  | 0.2                                   | 60                  | 97%                     | 6          |
| 7     | BM55                                                           | 25                  | 0.5                                   | 60                  | 98%                     | 7          |
| 8     | 0.9N-BiOBr                                                     | 10                  | 0.1                                   | 45                  | 99%                     | This work  |

1 To eliminate differences in the exposure of active sites, the surface-area-normalized kinetic  
 2 constants ( $k/S_{BET}$ ) of pure BiOBr, 0.6N-BiOBr, 0.9N-BiOBr and 1.2N-BiOBr were calculated  
 3 as 0.36, 1.56, 3.52, and 0.85  $\text{mg}\cdot\text{m}^{-2}\cdot\text{min}^{-1}$ , respectively (Table S2).

4 **Table S2** Kinetic constants, BET surface areas and surface-area-normalized kinetic constants of  $x\text{N-BiOBr}$   
 5 and pure BiOBr samples.

| Sample                                                               | BiOBr                 | 0.6N-BiOBr            | 0.9N-BiOBr            | 1.2N-BiOBr            |
|----------------------------------------------------------------------|-----------------------|-----------------------|-----------------------|-----------------------|
| $k$ ( $\text{min}^{-1}$ )                                            | $0.532\times 10^{-2}$ | $3.229\times 10^{-2}$ | $8.152\times 10^{-2}$ | $1.946\times 10^{-2}$ |
| $S_{BET}$ ( $\text{m}^2\cdot\text{g}^{-1}$ )                         | 17.706                | 20.691                | 23.174                | 22.969                |
| $k/S_{BET}$<br>( $\text{g}\cdot\text{m}^{-2}\cdot\text{min}^{-1}$ )  | $0.30\times 10^{-3}$  | $1.56\times 10^{-3}$  | $3.52\times 10^{-3}$  | $0.85\times 10^{-3}$  |
| $k/S_{BET}$<br>( $\text{mg}\cdot\text{m}^{-2}\cdot\text{min}^{-1}$ ) | 0.36                  | 1.56                  | 3.52                  | 0.85                  |

6

7 **Table S3** The atomic ratio of Bi, O, Br, N and N/Bi in pure BiOBr and  $x\text{N-BiOBr}$  samples determined from  
 8 XPS spectra.

| Element (atom%) | BiOBr | 0.6N-BiOBr           | 0.9N-BiOBr           | 1.2N-BiOBr           |
|-----------------|-------|----------------------|----------------------|----------------------|
| N               | 0     | 1.24                 | 3.23                 | 2.42                 |
| O               | 41.10 | 36.10                | 26.04                | 24.97                |
| Br              | 30.80 | 32.74                | 34.74                | 34.85                |
| Bi              | 28.1  | 29.92                | 35.99                | 37.76                |
| N/Bi            | 0     | $4.14\times 10^{-2}$ | $8.97\times 10^{-2}$ | $6.41\times 10^{-2}$ |

## 9 References

- 10 1 B. Weng, K. Lu, Z. Tang, H. Chen, Y. Xu, *Nat. Commun.*, 2018, **9**: 1543.  
 11 2 H. Fu, S. Zhang, T. Xu, Y. Zhu, J. Chen, *Environ. Sci. Technol.*, 2008, **42** (6), 2085–2091.  
 12 3 B., Weng, M. Yang, N. Zhang, Y. Xu, *J. Mater. Chem. A*, 2014, **2** (24), 9380–9389.  
 13 4 J. Zhou, J. Zhou, Z. Hu, L. Wang, *Mater. Sci. Semicond. Process.*, 2019, **90**: 112–119.  
 14 5 L. Xu, W. Chen, S. Ke, M. Zhu, W. Qiu, N. Liu, Namuangruk, S.; Maitarad, P.; Impeng, S.; Tang, L., *Catal.*  
 15 *Sci. Technol.*, 2019, **9** (21): 5953–5961.  
 16 6 W. Zhou, H. Ye, Z. Zhong, Q. Lu, R. Liu, M. Zhang, Z. Garba, L. Wang, Z. Yuan, *Cellulose*, 2021, **28** (15):  
 17 9893–9905.  
 18 7 W. Lou, L. Wang, Y. Zhang, Y. Xing, *Appl. Organomet. Chem.*, 2021, **35** (9): e6324.

19

20
